# Supplementary material
Source: ML conference proceedings conference paper supplement (https://proceedings.neurips.cc/paper_files/paper/2012/hash/670e8a43b246801ca1eaca97b3e19189-Abstract.html)
Supplement: Supplementary file [file 670e8a43b246801ca1eaca97b3e19189-Supplemental.zip]

## A Additional Material: Proofs for *Mixability in Statistical Learning*

Here we collect proofs that were omitted from the main body of the paper due to lack of space.

### A.1 Proof of Proposition 1

*Proof.* As  $\frac{e^{-\eta\ell(Y, f(X))}}{e^{-\eta\ell(Y, f^*(X))}} = e^{-\eta(\ell(Y, f(X)) - \ell(Y, f^*(X)))}$  is convex in  $\eta$ , linearity of expectation implies that  $\psi(\eta) := \mathbf{E} \left[ \frac{e^{-\eta\ell(Y, f(X))}}{e^{-\eta\ell(Y, f^*(X))}} \right]$  is also convex in  $\eta$ . Observing that  $\psi(0) = 1$ , we have 0-stochastic mixability. And by  $\psi(\gamma) = \psi((1 - \frac{\gamma}{\eta}) \cdot 0 + \frac{\gamma}{\eta} \cdot \eta) \leq (1 - \frac{\gamma}{\eta})\psi(0) + \frac{\gamma}{\eta}\psi(\eta) \leq 1$  we obtain  $\gamma$ -stochastic mixability.  $\square$

### A.2 Proof of Theorem 2

*Proof.* Let  $f^*$  be as in Definition 2. For  $\lambda \in [0, 1]$  and any distribution  $\pi$  on  $\mathcal{F}$ , define the function

$$\phi_\pi(\lambda, x, y) = -\ln \left( (1 - \lambda)e^{-\eta\ell(y, f^*(x))} + \lambda \int e^{-\eta\ell(y, f(x))} \pi(df) \right), \quad (10)$$

and let  $\phi_\pi(\lambda) = \mathbf{E}[\phi_\pi(\lambda, X, Y)]$  be its expectation. Then for any  $x$  and  $y$ ,  $\phi_\pi(\lambda, x, y)$  is convex in  $\lambda$ , because it is the composition of  $-\ln$  with a linear function. By linearity of expectation, it follows that  $\phi_\pi(\lambda)$  is also convex.

Stochastic mixability is related to  $\phi'_\pi(0)$ , the right-derivative of  $\phi_\pi$  at  $\lambda = 0$ , which we will now compute. As  $\phi_\pi(\lambda, x, y)$  is convex, the slope  $s_\pi(h, x, y) = \frac{\phi_\pi(0+h, x, y) - \phi_\pi(0, x, y)}{h}$  is nondecreasing in  $h$ , and

$$s_\pi(1/2, x, y) = 2 \ln \frac{e^{-\eta\ell(y, f^*(x))}}{\frac{1}{2}e^{-\eta\ell(y, f^*(x))} + \frac{1}{2} \int e^{-\eta\ell(y, f(x))} \pi(df)} \leq 2 \ln \frac{e^{-\eta\ell(y, f^*(x))}}{\frac{1}{2}e^{-\eta\ell(y, f^*(x))}} = 2 \ln 2.$$

Hence  $\mathbf{E}[s_\pi(1/2, X, Y)] \leq 2 \ln 2 < \infty$  and by the monotone convergence theorem [26]

$$\begin{aligned} \phi'_\pi(0) &= \lim_{h \downarrow 0} \mathbf{E}[s_\pi(h, X, Y)] = \mathbf{E} \left[ \lim_{h \downarrow 0} s_\pi(h, X, Y) \right] = \mathbf{E} \left[ \frac{d}{d\lambda} \phi_\pi(\lambda, X, Y) \Big|_{\lambda=0} \right] \\ &= 1 - \mathbf{E} \left[ \int \frac{e^{-\eta\ell(Y, f(X))}}{e^{-\eta\ell(Y, f^*(X))}} \pi(df) \right] = 1 - \int \mathbf{E} \left[ \frac{e^{-\eta\ell(Y, f(X))}}{e^{-\eta\ell(Y, f^*(X))}} \right] \pi(df). \end{aligned}$$

Comparing to (3), we see that  $\eta$ -stochastic mixability is equivalent to the property that  $\phi'_\pi(0) \geq 0$  for all  $\pi$ . And as  $\phi_\pi$  is convex, this in turn is equivalent to  $\phi_\pi(\lambda)$  being nondecreasing.

Suppose first that  $(\ell, \mathcal{F}, P^*)$  is  $\eta$ -stochastically mixable. Then, for any  $\pi$ ,  $\phi_\pi(\lambda)$  is nondecreasing and hence

$$\eta \mathbf{E}[\ell(Y, f^*(X))] = \phi_\pi(0) \leq \phi_\pi(1) = \mathbf{E} \left[ -\ln \int e^{-\eta\ell(Y, f(X))} \pi(df) \right],$$

from which (5) follows. Conversely, suppose that (5) holds for all  $\pi$ . Then it holds in particular for  $\pi = (1 - \lambda)\delta_{f^*} + \lambda\bar{\pi}$ , where  $\delta_{f^*}$  is a point-mass on  $f^*$ ,  $\lambda \in [0, 1]$  is arbitrary, and  $\bar{\pi}$  is an arbitrary distribution on  $\mathcal{F}$ . Plugging this choice of  $\pi$  into (5), we find that

$$\begin{aligned} \frac{1}{\eta} \phi_{\bar{\pi}}(0) &= \mathbf{E}[\ell(Y, f^*(X))] \\ &\leq \mathbf{E} \left[ -\frac{1}{\eta} \ln \left( (1 - \lambda)e^{-\eta\ell(y, f^*(x))} + \lambda \int e^{-\eta\ell(y, f(x))} \bar{\pi}(df) \right) \right] = \frac{1}{\eta} \phi_{\bar{\pi}}(\lambda) \end{aligned}$$

for any  $\lambda$  and  $\bar{\pi}$ . It follows that  $\phi_{\bar{\pi}}(\lambda)$  is minimized at  $\lambda = 0$ , and hence by its convexity that it is nondecreasing. As we have established that  $\eta$ -stochastic mixability is implied when  $\phi_{\bar{\pi}}(\lambda)$  is nondecreasing for all  $\bar{\pi}$ , the proof is complete.  $\square$

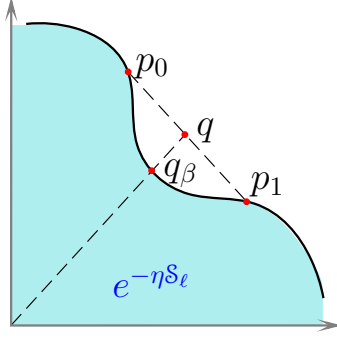

Figure 2: Illustration of the proof of Lemma 7.

### A.3 Proof of Lemma 6

*Proof.* Let  $f \in \mathcal{F}$  be arbitrary, and for  $0 \leq \lambda < 1$  define

$$\mu(\lambda) = \mathbf{E} \left[ -\frac{1}{\eta} \ln \left( (1 - \lambda) e^{-\eta \ell(Y, f^*(X))} + \lambda e^{-\eta \ell(Y, f(X))} \right) \right].$$

Then  $\eta$ -mixability of  $\ell$  implies that for any  $x \in \mathcal{X}$  and  $\lambda$  there exists  $a_\lambda(x) \in \mathcal{A}$  such that

$$\ell(y, a_\lambda(x)) \leq -\frac{1}{\eta} \ln \left( (1 - \lambda) e^{-\eta \ell(y, f^*(x))} + \lambda e^{-\eta \ell(y, f(x))} \right) \quad \forall y \in \mathcal{Y}.$$

Hence for any  $\lambda$ , we have  $\mu(\lambda) \geq \mathbf{E}[\ell(Y, a_\lambda(X))] \geq \mathbf{E}[\ell(Y, f^*(X))] = \mu(0)$ . This implies that  $\mu'(0) \geq 0$ , where  $\mu'(\lambda)$  is the right-derivative of  $\mu(\lambda)$ , and the lemma follows by computing  $\mu'(0)$ :

$$\begin{aligned} \mu'(\lambda) &= \frac{-1}{\eta} \mathbf{E} \left[ \frac{e^{-\eta \ell(Y, f(X))} - e^{-\eta \ell(Y, f^*(X))}}{(1 - \lambda) e^{-\eta \ell(Y, f^*(X))} + \lambda e^{-\eta \ell(Y, f(X))}} \right] \\ 0 \leq \eta \mu'(0) &= \mathbf{E} \left[ \frac{e^{-\eta \ell(Y, f^*(X))} - e^{-\eta \ell(Y, f(X))}}{e^{-\eta \ell(Y, f^*(X))}} \right] = 1 - \mathbf{E} \left[ \frac{e^{-\eta \ell(Y, f(X))}}{e^{-\eta \ell(Y, f^*(X))}} \right]. \quad \square \end{aligned}$$

### A.4 Proof of Lemma 7

*Proof.* Suppose that  $\ell$  is not  $\eta$ -mixable. Then we will show that  $(\ell, \mathcal{F}_{\text{full}})$  cannot be  $\eta$ -stochastically mixable either. Since  $\ell$  is not  $\eta$ -mixable, there must exist  $p_0, p_1 \in \Phi := e^{-\eta S_\ell}$  and  $\lambda \in (0, 1)$  such that  $q := (1 - \lambda)p_0 + \lambda p_1$  is not in  $\Phi$  (see Figure 2). For  $i = 1, 2$ , we have  $-\frac{1}{\eta} \ln p_i \in S_\ell$ , so there must exist predictions  $a_0, a_1 \in \mathcal{A}$  such that  $\ell_{a_i}(y) \leq -\frac{1}{\eta} \ln p_i(y)$  for all  $y$  or, equivalently,  $e^{-\eta \ell_{a_i}(y)} \geq p_i(y)$ . Let  $f_i \in \mathcal{F}_{\text{full}}$  be such that  $f_i(x) = a_i$  for all  $x$ . We will construct a distribution  $P^*$  on  $\mathcal{X} \times \mathcal{Y}$  such that

$$\mathbf{E}_{P^*} [\ell(Y, f(X))] > \mathbf{E}_{P^*} \left[ -\frac{1}{\eta} \ln q(Y) \right] \quad (11)$$

for all  $f \in \mathcal{F}_{\text{full}}$ . But, by the monotonicity of  $-\ln$ , we have

$$\mathbf{E}_{P^*} \left[ -\frac{1}{\eta} \ln q(Y) \right] \geq \mathbf{E}_{P^*} \left[ -\frac{1}{\eta} \ln \left( (1 - \lambda) e^{-\eta \ell(Y, f_0(X))} + \lambda e^{-\eta \ell(Y, f_1(X))} \right) \right],$$

which contradicts  $\eta$ -stochastic mixability of  $(\ell, \mathcal{F}_{\text{full}}, P^*)$  by the characterization in Theorem 2 for the distribution  $\pi$  that assigns point masses  $1 - \lambda$  and  $\lambda$  to  $f_0$  and  $f_1$ , respectively.

Our approach to establish (11) is illustrated by Figure 2. We define  $q_\alpha = \alpha q$  for  $\alpha \in [0, 1]$ , and let  $\beta = \sup\{\alpha \mid q_\alpha \in \Phi\}$ . We will show that  $\beta \in [0, 1)$  and that  $q_\beta$  lies on the boundary of  $\Phi$ . Then, by assumption,  $-\frac{1}{\eta} \ln q_\beta$  is supportable, so that there exists a distribution  $P_Y^*$  on  $\mathcal{Y}$  such that

$$\mathbf{E}_{P_Y^*} \left[ -\frac{1}{\eta} \ln q_\beta(Y) \right] \leq \mathbf{E}_{P_Y^*} [t(Y)] \quad \text{for all } t \in \mathcal{S}. \quad (12)$$

Now let  $P_X^*$  be any distribution on  $\mathcal{X}$  and define  $P^* = P_X^* \times P_Y^*$ . Then, for any  $f \in \mathcal{F}_{\text{full}}$ , (12) implies that

$$\begin{aligned} \mathbf{E}_{P^*}[\ell(Y, f(X))] &= \mathbf{E}_{P_X^*} \mathbf{E}_{P_Y^*}[\ell(Y, f(X)) \mid X] \\ &\geq \mathbf{E}_{P_X^*} \mathbf{E}_{P_Y^*} \left[ -\frac{1}{\eta} \ln q_\beta(Y) \right] \\ &= \mathbf{E}_{P^*} \left[ -\frac{1}{\eta} \ln q(Y) \right] - \frac{1}{\eta} \ln \beta \\ &> \mathbf{E}_{P^*} \left[ -\frac{1}{\eta} \ln q(Y) \right], \end{aligned}$$

as required.

To show that  $\beta \in [0, 1)$ , we first observe that  $0 \leq q_0(y)$  for all  $y$ , so that  $q_0 \in \Phi$  and hence  $\beta \geq 0$ . Furthermore,  $q_\alpha \in \Phi$  for all  $\alpha < \beta$  since for any  $0 < \epsilon < \beta - \alpha$ , we have  $q_{\beta-\epsilon} \in \Phi$  which implies that there exists a prediction  $a \in \mathcal{A}$  such that  $\ell_a(y) \leq -\frac{1}{\eta} \ln q_{\beta-\epsilon}(y) \leq -\frac{1}{\eta} \ln q_\alpha(y)$  for all  $y$ . Hence  $-\frac{1}{\eta} \ln q_\alpha \in \mathcal{S}$ , and  $q_\alpha \in \Phi$ . But now

$$\lim_{\alpha \uparrow \beta} \|q_\beta - q_\alpha\| = \lim_{\alpha \uparrow \beta} (\beta - \alpha) \|q\| \leq \lim_{\alpha \uparrow \beta} (\beta - \alpha) = 0,$$

so the assumption that  $\Phi$  is closed implies that  $q_\beta \in \Phi$ , and hence  $q_\beta \neq q$ , showing that  $\beta < 1$ .

Finally, to prove that  $q_\beta$  lies on the boundary of  $\Phi$ , consider a ball  $B_\epsilon = \{r \in \Phi \mid \|r - q_\beta\| < \epsilon\}$  of arbitrary radius  $\epsilon \in (0, 1 - \beta]$ . This ball contains the point  $q_{\beta+\epsilon/2}$ , which lies outside of  $\Phi$  by definition of  $\beta$ . Hence  $B_\epsilon$  is not contained in  $\Phi$  for any  $\epsilon$ , and consequently  $q_\beta$  must lie on the boundary of  $\Phi$ .  $\square$

## A.5 Proofs of Theorem 8 and Corollary 9

For  $\eta > 0$ , define

$$h_\eta(f, f^*) = \frac{1}{\eta} \left( 1 - \mathbf{E} \left[ \frac{e^{-\eta \ell(Y, f(X))}}{e^{-\eta \ell(Y, f^*(X))}} \right] \right).$$

The letter  $h$  comes from the special case of log-loss,  $\mathcal{X} = \{x\}$  a singleton, and a correct model  $\mathcal{F}$  that includes the true distribution  $P^*(Y|X = x)$ , because in this case  $h_{1/2}$  is the squared Hellinger distance.

Also define the positive, continuous, increasing function  $\phi(a) = (e^a - a - 1)/a^2$  for  $a \neq 0$  and  $\phi(0) = 1/2$ .

We need the following lemma, which is similar to Lemma 8.2 by Audibert [27] and to item (4) of Proposition 1.2 by Zhang [21].

**Lemma 10.** *Suppose  $|\ell(Y, f(X)) - \ell(Y, f^*(X))| \leq V$  (a.s.) for  $V < \infty$ . Then for any  $\eta > 0$  there exists  $c_{\eta, f} \in [\phi(-\eta V), \phi(\eta V)]$  such that*

$$d(f, f^*) = h_\eta(f, f^*) + c_{\eta, f} \eta V(f, f^*).$$

*Proof.* Let  $Z = \ell(Y, f(X)) - \ell(Y, f^*(X)) \in [-V, V]$ . We need to show

$$\mathbf{E}[Z] = \frac{1}{\eta} (1 - \mathbf{E}[e^{-\eta Z}]) + c_{\eta, f} \eta \mathbf{E}[Z^2]. \quad (13)$$

Suppose  $\mathbf{E}[Z^2] = 0$ . Then  $Z = 0$  (a.s.), and (13) is satisfied for any constant  $c_{\eta, f}$ . Otherwise (13) may be rewritten as

$$\mathbf{E} \left[ \frac{(\eta Z)^2}{\mathbf{E}[(\eta Z)^2]} \cdot \phi(-\eta Z) \right] = c_{\eta, f}.$$

Recognising the left-hand side as the expectation of  $\phi(-\eta Z)$  under the distribution with density  $(\eta Z)^2 dP^* / \mathbf{E}[(\eta Z)^2]$ , its value must lie in the interval  $[\min_z \phi(-\eta z), \max_z \phi(-\eta z)]$ . As  $\phi$  is increasing, these extreme values are achieved at  $z = -V$  and  $z = V$ , from which the lemma follows.  $\square$

*Proof of Theorem 8.* Although  $h_\eta$  is nonnegative when it equals the squared Hellinger distance, this property does not hold in general. In fact, we observe that  $\eta$ -stochastic mixability up to  $\epsilon$  is equivalent to

$$h_\eta(f, f^*) \geq 0 \quad \text{for all } f \in \mathcal{F} \text{ such that } d(f, f^*) \geq \epsilon. \quad (14)$$

(Only if) Suppose the margin condition (7) holds with constants  $\kappa \geq 1$  and  $c_0 > 0$ . Then Lemma 10 implies that

$$d(f, f^*) - h_\eta(f, f^*) \leq \phi(\eta V) \eta V(f, f^*) \leq \phi(\eta V) \eta c_0^{-1/\kappa} d(f, f^*)^{1/\kappa}. \quad (15)$$

Now let  $\epsilon > 0$  be arbitrary. As the loss is bounded by  $V$ , we have  $d(f, f^*) \leq V$ . Hence for  $\epsilon > V$  (14) is trivially satisfied. So assume without loss of generality that  $\epsilon \leq V$ , and let  $\eta = C\epsilon^{\frac{\kappa-1}{\kappa}}$  for some constant  $C \in (0, V^{-\frac{\kappa-1}{\kappa}}]$  to be determined later. Then  $\eta \leq 1$ , so that the fact that  $\phi$  is increasing implies  $\phi(\eta V) \leq \phi(V)$ . Now for any  $f \in \mathcal{F}$  such that  $d(f, f^*) \geq \epsilon$  we have

$$\phi(\eta V) \eta c_0^{-1/\kappa} \leq \phi(V) c_0^{-1/\kappa} C \epsilon^{\frac{\kappa-1}{\kappa}} \leq \phi(V) c_0^{-1/\kappa} C d(f, f^*)^{\frac{\kappa-1}{\kappa}}.$$

Combining this with (15), we find

$$\begin{aligned} d(f, f^*) - h_\eta(f, f^*) &\leq \phi(V) c_0^{-1/\kappa} C d(f, f^*) \\ h_\eta(f, f^*) &\geq (1 - \phi(V) c_0^{-1/\kappa} C) d(f, f^*). \end{aligned}$$

Taking  $C = \min \left\{ \frac{c_0^{1/\kappa}}{\phi(V)}, \frac{1}{V^{(\kappa-1)/\kappa}} \right\}$  such that  $1 - \phi(V) c_0^{-1/\kappa} C \geq 0$ , and using  $d(f, f^*) \geq 0$ , we find that  $h_\eta(f, f^*) \geq 0$  as required. This shows that the margin condition implies  $\eta$ -stochastic mixability up to  $\epsilon$  for  $\eta = C\epsilon^{(\kappa-1)/\kappa}$ .

(If) Suppose the margin condition does not hold for  $\kappa$ . That is, for every  $c_0 > 0$  there exists  $f_{c_0} \in \mathcal{F}$  such that

$$c_0 V(f_{c_0}, f^*)^\kappa > d(f_{c_0}, f^*).$$

We will show that for every  $C > 0$  there exists  $\epsilon > 0$  such that (14) with  $\eta = C\epsilon^{(\kappa-1)/\kappa}$  is violated. Let  $C > 0$  be arbitrary and take  $\epsilon = d(f_{c_0}, f^*) \leq V$  for some  $c_0 > 0$  to be determined later. Then  $\eta \leq CV^{(\kappa-1)/\kappa}$  so that  $\phi(-\eta V) \geq \phi(-CV^{2-1/\kappa})$  and hence Lemma 10 implies that

$$\begin{aligned} d(f_{c_0}, f^*) - h_\eta(f_{c_0}, f^*) &\geq \phi(-\eta V) \eta V(f_{c_0}, f^*) > \phi(-\eta V) \eta c_0^{1/\kappa} d(f_{c_0}, f^*)^{1/\kappa} \\ \epsilon - h_\eta(f_{c_0}, f^*) &> \phi(-CV^{2-1/\kappa}) \eta c_0^{1/\kappa} \epsilon^{1/\kappa} = \phi(-CV^{2-1/\kappa}) c_0^{1/\kappa} C \epsilon \\ h_\eta(f_{c_0}, f^*) &< (1 - \phi(-CV^{2-1/\kappa}) c_0^{1/\kappa} C) \epsilon. \end{aligned}$$

Choosing  $c_0 \geq (\phi(-CV^{2-1/\kappa}) C)^{-\kappa}$  gives  $1 - \phi(-CV^{2-1/\kappa}) c_0^{1/\kappa} C \leq 0$  and so we find that  $h_\eta(f_{c_0}, f^*) < 0$  for  $f_{c_0} \in \mathcal{F}$  such that  $d(f_{c_0}, f^*) = \epsilon$ . This violates (14), as was to be shown.  $\square$

**Lemma 11.** Suppose the margin condition (7) is satisfied for some constants  $c_0 > 0$  and  $1 \leq \kappa < \infty$ . Then the loss of  $f^*$  is almost surely unique. That is, if  $\mathbf{E}[\ell(Y, g^*(X))] = \mathbf{E}[\ell(Y, f^*(X))] = \min_{f \in \mathcal{F}} \mathbf{E}[\ell(Y, f(X))]$ , then  $\ell(Y, g^*(X)) = \ell(Y, f^*(X))$  almost surely.

*Proof.* We have  $d(g^*, f^*) = 0$ , and hence (7) implies that  $V(g^*, f^*) = 0$ , from which the lemma follows.  $\square$

*Proof of Corollary 9.* If  $(\ell, \mathcal{F}, P^*)$  is stochastically mixable, then the margin condition (7) holds with  $\kappa = 1$  by Theorem 8. Conversely, if (7) holds with  $\kappa = 1$  then Theorem 8 implies that  $(\ell, \bigcup_{\epsilon > 0} \mathcal{F}_\epsilon, P^*)$  is stochastically mixable, which by Lemma 11 implies stochastic mixability of  $(\ell, \mathcal{F}, P^*)$ .  $\square$
